# Supplementary material for: Soxhlet extraction of Momordica cochinchinensis fruit peel for β-carotene recovery
Source: Royal Society of Chemistry journal article supplement (doi:10.1039/d4ra08999e), 2025-01-01
Supplement: d4ra08999e1.xlsx [file d4ra08999e1.xlsx]

## Sheet: Fig 2
	Fig 2a					Fig 2b
		Solvents
		EA	AC	Mixture			Calib surface
	lamda, nm	Abs	Abs	Abs				C, mg/mL
	600	0.004669	0.003481	0.001229				0	0.5	1	1.5	2	2.5	3	3.5	4	4.5	5	5.5	6	6.5	7	7.5	8	8.5	9	9.5	10
	599	0.005135	0.00507	0.000732		r	0	-0.0087	0.0763	0.1612	0.2461	0.3309	0.4157	0.5004	0.585	0.6696	0.7542	0.8386	0.9231	1.0075	1.0918	1.176	1.2603	1.3444	1.4285	1.5126	1.5966	1.6805
	598	0.000349	-0.000493	0.001333			0.2	-0.0082	0.077	0.1622	0.2473	0.3324	0.4174	0.5023	0.5872	0.6721	0.7569	0.8416	0.9263	1.0109	1.0955	1.18	1.2645	1.3489	1.4333	1.5176	1.6018	1.686
	597	0.001641	0.002217	0.001516			0.4	-0.0078	0.0777	0.1631	0.2485	0.3338	0.419	0.5043	0.5894	0.6745	0.7595	0.8445	0.9295	1.0143	1.0992	1.1839	1.2687	1.3533	1.4379	1.5225	1.607	1.6915
	596	-0.000274	0.000202	0.001462			0.6	-0.0074	0.0783	0.164	0.2496	0.3352	0.4207	0.5061	0.5915	0.6769	0.7622	0.8474	0.9326	1.0177	1.1028	1.1878	1.2728	1.3577	1.4426	1.5274	1.6121	1.6968
	595	0.000152	-0.00255	0.002649			0.8	-0.0071	0.0789	0.1648	0.2507	0.3365	0.4222	0.5079	0.5936	0.6792	0.7647	0.8502	0.9357	1.0211	1.1064	1.1917	1.2769	1.362	1.4472	1.5322	1.6172	1.7022
	594	0.000826	0.002644	0.002023			1	-0.0068	0.0794	0.1656	0.2517	0.3377	0.4238	0.5097	0.5956	0.6815	0.7673	0.853	0.9387	1.0243	1.1099	1.1954	1.2809	1.3663	1.4517	1.537	1.6223	1.7075
	593	0.000992	2.4e-05	0.001819			1.2	-0.0066	0.0799	0.1663	0.2527	0.339	0.4252	0.5114	0.5976	0.6837	0.7697	0.8557	0.9417	1.0276	1.1134	1.1992	1.2849	1.3706	1.4562	1.5417	1.6272	1.7127
	592	0.005298	0.002136	0.001917			1.4	-0.0065	0.0803	0.167	0.2536	0.3401	0.4267	0.5131	0.5995	0.6859	0.7722	0.8584	0.9446	1.0307	1.1168	1.2029	1.2888	1.3747	1.4606	1.5464	1.6322	1.7179
	591	0.00377	0.003408	0.001411			1.6	-0.0063	0.0807	0.1676	0.2545	0.3413	0.428	0.5147	0.6014	0.688	0.7746	0.8611	0.9475	1.0339	1.1202	1.2065	1.2927	1.3789	1.465	1.5511	1.6371	1.723
	590	0.000717	-0.000791	0.002693			1.8	-0.0063	0.081	0.1682	0.2553	0.3423	0.4294	0.5163	0.6032	0.6901	0.7769	0.8636	0.9503	1.037	1.1235	1.2101	1.2966	1.383	1.4693	1.5557	1.6419	1.7281
	589	0.002311	-0.000263	0.003314			2	-0.0062	0.0813	0.1687	0.2561	0.3434	0.4306	0.5179	0.605	0.6921	0.7792	0.8662	0.9531	1.04	1.1268	1.2136	1.3003	1.387	1.4736	1.5602	1.6467	1.7332
	588	-0.00285	-0.001381	0.002095			2.2	-0.0062	0.0815	0.1692	0.2568	0.3444	0.4319	0.5193	0.6068	0.6941	0.7814	0.8687	0.9559	1.043	1.1301	1.2171	1.3041	1.391	1.4779	1.5647	1.6515	1.7382
	587	0.000478	-0.003044	0.002721			2.4	-0.0063	0.0817	0.1696	0.2575	0.3453	0.4331	0.5208	0.6084	0.696	0.7836	0.8711	0.9585	1.0459	1.1333	1.2206	1.3078	1.395	1.4821	1.5691	1.6562	1.7431
	586	0.003978	0.002679	0.002444			2.6	-0.0064	0.0818	0.17	0.2581	0.3462	0.4342	0.5222	0.6101	0.6979	0.7857	0.8735	0.9612	1.0488	1.1364	1.224	1.3114	1.3989	1.4862	1.5735	1.6608	1.748
	585	0.003215	0.002434	0.002126			2.8	-0.0066	0.0819	0.1703	0.2587	0.347	0.4353	0.5235	0.6117	0.6998	0.7878	0.8758	0.9638	1.0517	1.1395	1.2273	1.315	1.4027	1.4903	1.5779	1.6654	1.7529
	584	0.004326	0.004637	0.003235			3	-0.0068	0.0819	0.1706	0.2592	0.3478	0.4363	0.5248	0.6132	0.7016	0.7899	0.8781	0.9663	1.0545	1.1426	1.2306	1.3186	1.4065	1.4944	1.5822	1.67	1.7577
	583	0.001332	0.003488	0.003481			3.2	-0.0071	0.0819	0.1708	0.2597	0.3486	0.4373	0.526	0.6147	0.7033	0.7919	0.8804	0.9688	1.0572	1.1456	1.2339	1.3221	1.4103	1.4984	1.5865	1.6745	1.7624
	582	-0.001587	-0.001545	0.003287			3.4	-0.0074	0.0818	0.171	0.2602	0.3492	0.4383	0.5272	0.6162	0.705	0.7938	0.8826	0.9713	1.0599	1.1485	1.2371	1.3255	1.414	1.5023	1.5907	1.6789	1.7671
	581	0.003107	0.00128	0.004388			3.6	-0.0077	0.0817	0.1712	0.2606	0.3499	0.4392	0.5284	0.6176	0.7067	0.7957	0.8847	0.9737	1.0626	1.1514	1.2402	1.3289	1.4176	1.5063	1.5948	1.6833	1.7718
	580	-0.002233	-0.000948	0.003433			3.8	-0.0082	0.0816	0.1713	0.2609	0.3505	0.44	0.5295	0.6189	0.7083	0.7976	0.8868	0.976	1.0652	1.1543	1.2433	1.3323	1.4212	1.5101	1.5989	1.6877	1.7764
	579	0.002531	-0.00428	0.003561			4	-0.0086	0.0814	0.1713	0.2612	0.351	0.4408	0.5305	0.6202	0.7098	0.7994	0.8889	0.9783	1.0677	1.1571	1.2464	1.3356	1.4248	1.5139	1.603	1.692	1.781
	578	0.003884	0.005154	0.003734			4.2	-0.0091	0.0811	0.1713	0.2615	0.3515	0.4416	0.5315	0.6215	0.7113	0.8011	0.8909	0.9806	1.0702	1.1598	1.2494	1.3389	1.4283	1.5177	1.607	1.6963	1.7855
	577	0.001801	0.001858	0.002952			4.4	-0.0097	0.0808	0.1713	0.2617	0.352	0.4423	0.5325	0.6227	0.7128	0.8028	0.8929	0.9828	1.0727	1.1626	1.2523	1.3421	1.4318	1.5214	1.611	1.7005	1.79
	576	0.004085	0.004137	0.005212			4.6	-0.0103	0.0805	0.1712	0.2618	0.3524	0.4429	0.5334	0.6238	0.7142	0.8045	0.8948	0.985	1.0751	1.1652	1.2553	1.3453	1.4352	1.5251	1.6149	1.7047	1.7944
	575	-0.000931	0.005174	0.005795			4.8	-0.0109	0.0801	0.171	0.2619	0.3527	0.4435	0.5343	0.6249	0.7155	0.8061	0.8966	0.9871	1.0775	1.1678	1.2581	1.3484	1.4386	1.5287	1.6188	1.7088	1.7988
	574	0.000674	-0.00287	0.004136			5	-0.0116	0.0796	0.1708	0.262	0.3531	0.4441	0.5351	0.626	0.7169	0.8077	0.8984	0.9891	1.0798	1.1704	1.2609	1.3514	1.4419	1.5323	1.6226	1.7129	1.8031
	573	0.001157	-0.000359	0.005264			5.2	-0.0124	0.0791	0.1706	0.262	0.3533	0.4446	0.5358	0.627	0.7181	0.8092	0.9002	0.9912	1.0821	1.1729	1.2637	1.3545	1.4451	1.5358	1.6264	1.7169	1.8074
	572	-0.001991	-0.000734	0.00445			5.4	-0.0131	0.0786	0.1703	0.2619	0.3535	0.4451	0.5365	0.628	0.7193	0.8107	0.9019	0.9931	1.0843	1.1754	1.2664	1.3574	1.4484	1.5393	1.6301	1.7209	1.8116
	571	0.003966	-0.00295	0.00398			5.6	-0.014	0.078	0.17	0.2619	0.3537	0.4455	0.5372	0.6289	0.7205	0.8121	0.9036	0.9951	1.0865	1.1778	1.2691	1.3604	1.4515	1.5427	1.6338	1.7248	1.8158
	570	0.00521	0.005509	0.005171			5.8	-0.0149	0.0774	0.1696	0.2617	0.3538	0.4458	0.5378	0.6298	0.7216	0.8134	0.9052	0.9969	1.0886	1.1802	1.2717	1.3632	1.4547	1.5461	1.6374	1.7287	1.8199
	569	0.002102	0.001838	0.004309			6	-0.0158	0.0767	0.1691	0.2615	0.3539	0.4462	0.5384	0.6306	0.7227	0.8148	0.9068	0.9988	1.0907	1.1825	1.2743	1.3661	1.4578	1.5494	1.641	1.7325	1.824
	568	0.005265	0.003159	0.005816			6.2	-0.0168	0.076	0.1687	0.2613	0.3539	0.4464	0.5389	0.6313	0.7237	0.816	0.9083	1.0005	1.0927	1.1848	1.2768	1.3688	1.4608	1.5527	1.6445	1.7363	1.828
	567	-8.2e-05	0.002412	0.006241			6.4	-0.0178	0.0752	0.1681	0.261	0.3539	0.4467	0.5394	0.6321	0.7247	0.8173	0.9098	1.0023	1.0947	1.187	1.2793	1.3716	1.4638	1.5559	1.648	1.74	1.832
	566	0.001292	-0.001765	0.00518			6.6	-0.0189	0.0743	0.1675	0.2607	0.3538	0.4468	0.5398	0.6327	0.7256	0.8184	0.9112	1.0039	1.0966	1.1892	1.2818	1.3743	1.4667	1.5591	1.6514	1.7437	1.8359
	565	0.00266	0.001754	0.005661			6.8	-0.02	0.0735	0.1669	0.2603	0.3537	0.447	0.5402	0.6334	0.7265	0.8196	0.9126	1.0056	1.0985	1.1913	1.2841	1.3769	1.4696	1.5622	1.6548	1.7474	1.8398
	564	0.002427	0.00174	0.005947			7	-0.0212	0.0725	0.1662	0.2599	0.3535	0.447	0.5405	0.634	0.7273	0.8207	0.9139	1.0072	1.1003	1.1934	1.2865	1.3795	1.4724	1.5653	1.6582	1.751	1.8437
	563	0.005707	0.001494	0.004691			7.2	-0.0224	0.0716	0.1655	0.2594	0.3533	0.4471	0.5408	0.6345	0.7281	0.8217	0.9152	1.0087	1.1021	1.1955	1.2888	1.382	1.4752	1.5684	1.6615	1.7545	1.8475
	562	0.00323	0.006	0.006457			7.4	-0.0237	0.0705	0.1647	0.2589	0.353	0.447	0.541	0.635	0.7289	0.8227	0.9165	1.0102	1.1038	1.1975	1.291	1.3845	1.478	1.5714	1.6647	1.758	1.8512
	561	0.000842	0.002449	0.006398			7.6	-0.025	0.0695	0.1639	0.2583	0.3527	0.447	0.5412	0.6354	0.7295	0.8236	0.9176	1.0116	1.1055	1.1994	1.2932	1.387	1.4807	1.5743	1.6679	1.7614	1.8549
	560	0.003412	0.004233	0.00548			7.8	-0.0264	0.0684	0.1631	0.2577	0.3523	0.4469	0.5414	0.6358	0.7302	0.8245	0.9188	1.013	1.1072	1.2013	1.2953	1.3894	1.4833	1.5772	1.671	1.7648	1.8586
	559	0.00027	0.001124	0.006929			8	-0.0278	0.0672	0.1621	0.257	0.3519	0.4467	0.5414	0.6361	0.7308	0.8253	0.9199	1.0143	1.1088	1.2031	1.2974	1.3917	1.4859	1.58	1.6741	1.7682	1.8622
	558	0.002927	-0.000662	0.005488			8.2	-0.0293	0.066	0.1612	0.2563	0.3514	0.4465	0.5415	0.6364	0.7313	0.8261	0.9209	1.0156	1.1103	1.2049	1.2995	1.394	1.4884	1.5828	1.6772	1.7715	1.8657
	557	0.006789	0.00192	0.004993			8.4	-0.0308	0.0647	0.1602	0.2556	0.3509	0.4462	0.5415	0.6367	0.7318	0.8269	0.9219	1.0169	1.1118	1.2067	1.3015	1.3962	1.491	1.5856	1.6802	1.7747	1.8692
	556	0.004018	0.002322	0.00578			8.6	-0.0324	0.0634	0.1591	0.2548	0.3504	0.4459	0.5414	0.6369	0.7322	0.8276	0.9229	1.0181	1.1133	1.2084	1.3034	1.3984	1.4934	1.5883	1.6832	1.7779	1.8727
	555	0.004617	0.002831	0.006048			8.8	-0.034	0.062	0.158	0.2539	0.3498	0.4456	0.5413	0.637	0.7326	0.8282	0.9238	1.0192	1.1147	1.21	1.3053	1.4006	1.4958	1.591	1.6861	1.7811	1.8761
	554	0.001924	0.005546	0.006038			9	-0.0356	0.0606	0.1568	0.253	0.3491	0.4452	0.5412	0.6371	0.733	0.8288	0.9246	1.0203	1.116	1.2116	1.3072	1.4027	1.4982	1.5936	1.6889	1.7842	1.8795
	553	0.000758	0.002978	0.00632
	552	0.00257	0.002274	0.006042
	551	-0.000131	0.003124	0.006129
	550	0.004334	-0.000941	0.006429
	549	0.00467	0.00317	0.005744
	548	0.003019	0.00466	0.006793
	547	0.003696	0.004465	0.006654
	546	0.000594	0.00574	0.006195
	545	0.001547	0.003598	0.007129
	544	0.002658	0.00344	0.007552
	543	0.001638	0.003707	0.006201
	542	0.003965	0.003495	0.007214
	541	0.00374	0.004984	0.008134
	540	0.002994	0.005684	0.007527
	539	0.004276	0.007463	0.008199
	538	0.002615	0.009039	0.009325
	537	0.004008	0.006133	0.008587
	536	0.003507	0.006957	0.008669
	535	0.003117	0.007898	0.008519
	534	0.005166	0.007605	0.009954
	533	0.004731	0.009158	0.010365
	532	0.002994	0.010253	0.010241
	531	0.004912	0.010204	0.011552
	530	0.003995	0.012288	0.011871
	529	0.005478	0.011408	0.012204
	528	0.007757	0.012295	0.013774
	527	0.006433	0.013794	0.014695
	526	0.007515	0.01375	0.015592
	525	0.00663	0.018506	0.016841
	524	0.00699	0.020247	0.017861
	523	0.008923	0.020618	0.019489
	522	0.007976	0.023808	0.021014
	521	0.012356	0.023993	0.022646
	520	0.012518	0.026571	0.025994
	519	0.011876	0.031763	0.02807
	518	0.014466	0.035077	0.030617
	517	0.013826	0.041141	0.034435
	516	0.013265	0.04544	0.037479
	515	0.016341	0.046456	0.041541
	514	0.018623	0.053948	0.046552
	513	0.023176	0.05735	0.051846
	512	0.02284	0.062983	0.057906
	511	0.023272	0.074159	0.064689
	510	0.02893	0.081859	0.071201
	509	0.028475	0.093411	0.079592
	508	0.035182	0.103722	0.088283
	507	0.040153	0.110345	0.098437
	506	0.042301	0.122798	0.110077
	505	0.048948	0.136404	0.120913
	504	0.051674	0.149452	0.133134
	503	0.053613	0.168744	0.147234
	502	0.062596	0.182578	0.161243
	501	0.064855	0.19842	0.17679
	500	0.072838	0.217203	0.19328
	499	0.081236	0.230782	0.209629
	498	0.088025	0.252397	0.22781
	497	0.09619	0.268903	0.245091
	496	0.099865	0.288577	0.262377
	495	0.107929	0.311529	0.281196
	494	0.116561	0.328667	0.299276
	493	0.123613	0.348355	0.318911
	492	0.133049	0.367495	0.334569
	491	0.141254	0.383925	0.350947
	490	0.144865	0.401813	0.367646
	489	0.153301	0.417897	0.382627
	488	0.166124	0.43219	0.395297
	487	0.165477	0.447211	0.407431
	486	0.17216	0.457515	0.419008
	485	0.177043	0.468082	0.428287
	484	0.182348	0.476041	0.435155
	483	0.186201	0.480862	0.441517
	482	0.188641	0.488018	0.445438
	481	0.192532	0.491696	0.449075
	480	0.192737	0.493759	0.449968
	479	0.196089	0.496871	0.450422
	478	0.198882	0.495208	0.450809
	477	0.199693	0.495507	0.449071
	476	0.201698	0.493448	0.447459
	475	0.200301	0.490442	0.445129
	474	0.200358	0.490711	0.442421
	473	0.20044	0.489686	0.441413
	472	0.200027	0.48843	0.440385
	471	0.201675	0.490181	0.439694
	470	0.202844	0.486233	0.440599
	469	0.202724	0.48881	0.441845
	468	0.20487	0.491785	0.444485
	467	0.204303	0.49438	0.450122
	466	0.207052	0.500576	0.452904
	465	0.210416	0.506876	0.458596
	464	0.211575	0.512423	0.46718
	463	0.217611	0.521157	0.473833
	462	0.22054	0.527379	0.482062
	461	0.222378	0.534626	0.49021
	460	0.226415	0.543768	0.497381
	459	0.228655	0.549053	0.505458
	458	0.233901	0.559064	0.512314
	457	0.237016	0.564549	0.519056
	456	0.241032	0.567562	0.52457
	455	0.245401	0.573503	0.528101
	454	0.245503	0.574173	0.530281
	453	0.247281	0.57587	0.53168
	452	0.248507	0.57576	0.530458
	451	0.247158	0.572447	0.52882
	450	0.249613	0.571553	0.526065
	449	0.249907	0.564743	0.520894
	448	0.248111	0.558809	0.515614
	447	0.248543	0.551948	0.509
	446	0.245267	0.542428	0.500662
	445	0.243858	0.535133	0.49354
	444	0.241239	0.526206	0.484714
	443	0.237292	0.516525	0.476358
	442	0.237619	0.509053	0.468395
	441	0.234594	0.498296	0.459701
	440	0.231275	0.488662	0.451444
	439	0.229226	0.481092	0.445213
	438	0.224452	0.472567	0.43796
	437	0.223388	0.465711	0.432607
	436	0.221839	0.460341	0.428249
	435	0.219846	0.453658	0.423526
	434	0.220733	0.451602	0.419878
	433	0.217722	0.446706	0.416829
	432	0.216837	0.440315	0.412665
	431	0.214099	0.436353	0.410382
	430	0.212142	0.4331	0.40877
	429	0.212945	0.430341	0.404937
	428	0.211787	0.427832	0.401919
	427	0.210388	0.420011	0.397523
	426	0.21095	0.416218	0.392787
	425	0.208118	0.410274	0.388222
	424	0.206165	0.403953	0.382265
	423	0.203924	0.39667	0.376463
	422	0.201437	0.388157	0.369631
	421	0.199707	0.380262	0.361337
	420	0.197182	0.373595	0.354093
	419	0.195429	0.36185	0.345564
	418	0.19325	0.354553	0.336458
	417	0.186109	0.343179	0.327377
	416	0.185211	0.331229	0.319597
	415	0.179477	0.324588	0.311636
	414	0.177424	0.31405	0.304674
	413	0.178521	0.307077	0.295843
	412	0.171921	0.299679	0.289069
	411	0.171747	0.288905	0.282136
	410	0.168971	0.284899	0.275064
	409	0.164001	0.272558	0.269649
	408	0.162793	0.265846	0.264208
	407	0.160631	0.263574	0.258681
	406	0.159301	0.254782	0.253506
	405	0.1597	0.250571	0.248629
	404	0.155394	0.246044	0.242734
	403	0.155053	0.236668	0.238636
	402	0.149569	0.233618	0.232912
	401	0.145524	0.224169	0.22799
	400	0.14757	0.217976	0.223296
	399	0.141679	0.216127	0.217016
	398	0.142637	0.20924	0.21132
	397	0.142055	0.205168	0.205573
	396	0.134305	0.197645	0.198913
	395	0.132983	0.188694	0.193499
	394	0.129295	0.183785	0.188861
	393	0.126036	0.175264	0.182238
	392	0.127565	0.169457	0.177396
	391	0.123014	0.166296	0.1714
	390	0.122543	0.158425	0.166157
	389	0.122558	0.155688	0.161833
	388	0.116307	0.150667	0.156808
	387	0.117005	0.141534	0.15348
	386	0.113069	0.140915	0.149912
	385	0.113733	0.133445	0.145229
	384	0.116494	0.13186	0.142275
	383	0.111863	0.130914	0.139111
	382	0.113094	0.125041	0.134369
	381	0.109541	0.122134	0.132683
	380	0.105838	0.117353	0.130092
	379	0.106263	0.109973	0.126312
	378	0.104207	0.109334	0.123639
	377	0.10584	0.105225	0.120863
	376	0.107528	0.102649	0.117601
	375	0.101747	0.104835	0.114907
	374	0.101931	0.099346	0.111986
	373	0.097813	0.099585	0.11031
	372	0.095297	0.093129	0.108344
	371	0.096666	0.088107	0.105525
	370	0.09428	0.087784	0.103481
	369	0.096823	0.086925	0.101496
	368	0.095399	0.083591	0.099365
	367	0.093554	0.086266	0.098511
	366	0.094785	0.082494	0.097904
	365	0.092065	0.082286	0.096819
	364	0.093543	0.081572	0.096451
	363	0.094397	0.078792	0.096748
	362	0.09345	0.081354	0.095193
	361	0.096535	0.080449	0.095603
	360	0.095382	0.081774	0.095047
	359	0.094626	0.084511	0.096169
	358	0.09508	0.082675	0.096632
	357	0.094452	0.084191	0.096829
	356	0.096512	0.085091	0.097512
	355	0.099122	0.083743	0.097878
	354	0.098964	0.086908	0.097982
	353	0.100951	0.089343	0.099239
	352	0.098868	0.08902	0.100624
	351	0.099738	0.092971	0.101496
	350	0.10025	0.090384	0.102665

## Sheet: Fig 3 to 6
Fig. 3						Fig. 4a											Fig. 4b											Fig. 5a							Fig. 5b							Fig. 6a							Fig. 6b
Time (h)	C/C0					0:10		3:7		6:4		7:3		8:2			0:10		3:7		6:4		7:3		8:2			13g		26g		52g			13g		26g		52g			3.24 mL/min		8.64 mL/min		10.80 mL/min			3.24 mL/min
	EA-30	EA-60	AC-30	AC-60		t (min)	mb, cal	t (min)	mb, cal	t (min)	mb, cal	t (min)	mb, cal	t (min)	mb, cal		t (min)	mt, cal	t (min)	mt, cal	t (min)	mt, cal	t (min)	mt, cal	t (min)	mt, cal		t (min)	mb, cal	t (min)	mb, cal	t (min)	mb, cal		t (min)	mt, cal	t (min)	mt, cal	t (min)	mt, cal		t (min)	mb, cal	t (min)	mb, cal	t (min)	mb, cal		t (min)
0	1	1	1	1		0	0	0	0	0	0	0	0	0	0		0	0	0	0	0	0	0	0	0	0		0	0	0	0	0	0		0	0	0	0	0	0		0	0	0	0	0	0		0
1	1.00595	0.94951	1.00445	0.953038		1	0	1	0	1	0	1	0	1	0		1	6.8756	1	8.93023	1	10.6658	1	1.08654	1	0.370982		1	0	1	0	1	0		1	5.664	1	10.6658	1	20.5483		1	0	1	0	1	0		1
2	0.980829	0.756533	1.01378	0.918364		2	0	2	0	2	0	2	0	2	0		2	9.02523	2	11.4869	2	13.5559	2	2.07111	2	0.724476		2	0	2	0	2	0		2	7.21016	2	13.5559	2	27.0629		2	0	2	0	2	0		2
3	0.941451	0.648101	0.985504	0.939402		3	0	3	0	3	0	3	0	3	0		3	9.69711	3	12.2185	3	14.3364	3	2.96322	3	1.06128		3	0	3	0	3	0		3	7.63141	3	14.3364	3	29.1208		3	0	3	0	3	0		3
4	0.936327	0.47931	0.986652	0.872796		4	0	4	0	4	0	4	0	4	0		4	9.90692	4	12.4275	4	14.5445	4	3.7715	4	1.38214		4	0	4	0	4	0		4	7.74536	4	14.5445	4	29.7635		4	0	4	0	4	0		4
5	0.942564	0.31796	0.959936	0.843747		5	0	5	0	5	0	5	0	5	0		5	9.97224	5	12.4868	5	14.5972	5	4.50378	5	1.6878		5	0	5	0	5	0		5	7.77536	5	14.5972	5	29.9567		5	0	5	0	5	0		5
						6	0	6	0	6	0	6	0	6	0		6	9.99239	6	12.5032	6	14.6079	6	5.16714	6	1.97894		6	0	6	0	6	0		6	7.78242	6	14.6079	6	30.0073		6	0	6	0	6	0		6
mt (mg)						7	0	7	0	7	0	7	0	7	0		7	9.99841	7	12.5074	7	14.6071	7	5.76803	7	2.25623		7	0	7	0	7	0		7	7.78322	7	14.6071	7	30.0125		7	0	7	0	7	0		7
mb (mg)						8	0	8	0	8	0	8	0	8	0		8	10	8	12.508	8	14.6032	8	6.31228	8	2.52028		8	0	8	0	8	0		8	7.78231	8	14.6032	8	30.0033		8	0	8	0	8	0		8
						9	0	9	0	9	0	9	0	9	0		9	10.0002	9	12.5077	9	14.5984	9	6.80517	9	2.77171		9	0	9	0	9	0		9	7.78093	9	14.5984	9	29.9896		9	0	9	0	9	0		9
						10	0	10	0	10	0	10	0	10	0		10	10	10	12.507	10	14.5935	10	7.25149	10	3.0111		10	0	10	0	10	0		10	7.77943	10	14.5935	10	29.9744		10	0	10	0	10	0		10
						11	0	11	0	11	0	11	0	11	0		11	9.99967	11	12.5063	11	14.5884	11	7.6556	11	3.23897		11	0	11	0	11	0		11	7.77789	11	14.5884	11	29.9588		11	0	11	0	11	0		11
						12	0	12	0	12	0	12	0	12	0		12	9.99928	12	12.5056	12	14.5834	12	8.02143	12	3.45587		12	0	12	0	12	0		12	7.77634	12	14.5834	12	29.943		12	0	12	0	12	0		12
						13	0	13	0	13	0	13	0	13	0		13	9.99888	13	12.5048	13	14.5783	13	8.35255	13	3.66229		13	0	13	0	13	0		13	7.77478	13	14.5783	13	29.9272		13	0	13	0	13	2.15747		13
						14	0	14	0	14	0	14	0	14	0		14	9.99847	14	12.5041	14	14.5733	14	8.65222	14	3.85871		14	0	14	0	14	2.2146		14	7.77323	14	14.5733	14	27.6968		14	0	14	2.2146	14	4.14338		14
						15	0.689239	15	0	15	1.0043	15	0	15	0.272349		15	9.30883	15	12.5033	15	13.564	15	8.92336	15	3.77323		15	0	15	1.0043	15	4.26299		15	7.77168	15	13.564	15	25.6326		15	0	15	4.26299	15	5.9713		15
						16	1.33091	16	0.806327	16	1.93869	16	0.583476	16	0.538035		16	8.66675	16	11.6962	16	12.6245	16	8.58515	16	3.68531		16	0	16	1.93869	16	6.15754		16	7.77013	16	12.6245	16	23.7222		16	0	16	6.15754	16	7.65374		16
						17	1.92829	17	1.56056	17	2.80802	17	1.14408	17	0.796916		17	8.06896	17	10.9412	17	11.7502	17	8.24638	17	3.59549		17	0	17	2.80802	17	7.90972		17	7.76858	17	11.7502	17	21.9542		17	0	17	7.90972	17	9.20222		17
						18	2.48444	18	2.26605	18	3.61679	18	1.68185	18	1.04889		18	7.5124	18	10.235	18	10.9364	18	7.90916	18	3.50428		18	0	18	3.61679	18	9.53015		18	7.76703	18	10.9364	18	20.318		18	0	18	9.53015	18	10.6274		18
						19	3.0022	19	2.92596	19	4.3692	19	2.19698	19	1.29387		19	6.99423	19	9.57433	19	10.1789	19	7.57533	19	3.41212		19	0	19	4.3692	19	11.0286		19	7.76548	19	10.1789	19	18.8038		19	0	19	11.0286	19	11.939		19
						20	3.48422	20	3.54323	20	5.06915	20	2.68974	20	1.53184		20	6.5118	20	8.95631	20	9.47393	20	7.24637	20	3.31943		20	0.39806	20	5.06915	20	12.4143		20	7.36587	20	9.47393	20	17.4023		20	0	20	12.4143	20	13.146		20
						21	3.93297	21	4.1206	21	5.72028	21	3.16053	21	1.76277		21	6.06265	21	8.37818	21	8.81778	21	6.92355	21	3.22656		21	0.775557	21	5.72028	21	13.6955		21	6.98682	21	8.81778	21	16.1054		21	0	21	13.6955	21	14.2568		21
						22	4.35073	22	4.66065	22	6.32596	22	3.60979	22	1.98667		22	5.64448	22	7.83738	22	8.20706	22	6.6079	22	3.13382		22	1.13355	22	6.32596	22	14.88		22	6.62728	22	8.20706	22	14.9051		22	0	22	14.88	22	15.279		22
						23	4.73965	23	5.16579	23	6.88935	23	4.03804	23	2.20359		23	5.25515	23	7.33148	23	7.63865	23	6.30022	23	3.04149		23	1.47304	23	6.88935	23	15.9751		23	6.28624	23	7.63865	23	13.7942		23	0	23	15.9751	23	16.2196		23
						24	5.10172	24	5.63828	24	7.41337	24	4.44585	24	2.41356		24	4.89267	24	6.85824	24	7.1096	24	6.00118	24	2.94984		24	1.79498	24	7.41337	24	16.9875		24	5.96275	24	7.1096	24	12.7662		24	0	24	16.9875	24	17.0852		24
						25	5.43878	25	6.08022	25	7.90075	25	4.83382	25	2.61665		25	4.5552	25	6.41554	25	6.6172	25	5.71127	25	2.85907		25	2.10027	25	7.90075	25	17.9232		25	5.65591	25	6.6172	25	11.8147		25	0	25	17.9232	25	17.8817		25
						26	5.75257	26	6.49359	26	8.35403	26	5.20259	26	2.81296		26	4.241	26	6.00142	26	6.15889	26	5.43087	26	2.76937		26	2.38978	26	8.35403	26	18.788		26	5.36485	26	6.15889	26	10.9342		26	0	26	18.788	26	18.6145		26
						27	6.04469	27	6.88022	27	8.77557	27	5.5528	27	3.00256		27	3.94848	27	5.61403	27	5.73233	27	5.16022	27	2.68092		27	2.6643	27	8.77557	27	19.5872		27	5.08878	27	5.73233	27	10.1193		27	0	27	19.5872	27	19.2888		27
						28	6.31663	28	7.24185	28	9.16757	28	5.88512	28	3.18558		28	3.67613	28	5.25165	28	5.33532	28	4.89948	28	2.59385		28	2.92462	28	9.16757	28	20.3257		28	4.82691	28	5.33532	28	9.3651		28	0	28	20.3257	28	19.9092		28
						29	6.56978	29	7.58009	29	9.53208	29	6.20022	29	3.36211		29	3.42257	29	4.91266	29	4.9658	29	4.64872	29	2.50829		29	3.17147	29	9.53208	29	21.0079		29	4.57852	29	4.9658	29	8.66713		29	0	29	21.0079	29	20.48		29
						30	6.80545	30	7.89645	30	9.87099	30	6.49878	30	3.53229		30	3.1865	30	4.59555	30	4.62187	30	4.40795	30	2.42434		30	3.40553	30	9.87099	30	21.6382		30	4.34291	30	4.62187	30	8.02119		30	0	30	21.6382	30	21.0052		30
						31	7.02483	31	8.19233	31	10.1861	31	6.78147	31	3.69625		31	2.96671	31	4.29891	31	4.30176	31	4.1771	31	2.34209		31	3.62747	31	10.1861	31	22.2203		31	4.11942	31	4.30176	31	7.42338		31	0	31	22.2203	31	21.4884		31
						32	7.22905	32	8.46907	32	10.479	32	7.04895	32	3.85411		32	2.76208	32	4.02142	32	4.00382	32	3.95607	32	2.26161		32	3.83791	32	10.479	32	22.7579		32	3.90744	32	4.00382	32	6.87013		32	0	32	22.7579	32	21.9329		32
						33	7.41916	33	8.7279	33	10.7513	33	7.30189	33	4.00603		33	2.57156	33	3.76184	33	3.72652	33	3.74469	33	2.18296		33	4.03744	33	10.7513	33	23.2542		33	3.70636	33	3.72652	33	6.35811		33	0	33	23.2542	33	22.3418		33
						34	7.59612	34	8.96997	34	11.0044	34	7.54093	34	4.15213		34	2.39419	34	3.51901	34	3.46843	34	3.54279	34	2.10619		34	4.22662	34	11.0044	34	23.7125		34	3.51563	34	3.46843	34	5.88425		34	0	34	23.7125	34	22.718		34
						35	7.76085	35	9.19636	35	11.2396	35	7.7667	35	4.29257		35	2.22905	35	3.29186	35	3.22821	35	3.35014	35	2.03132		35	4.40599	35	11.2396	35	24.1354		35	3.33472	35	3.22821	35	5.4457		35	0	35	24.1354	35	23.064		35
						36	7.91419	36	9.4081	36	11.4582	36	7.97981	36	4.42749		36	2.0753	36	3.07937	36	3.00462	36	3.1665	36	1.95839		36	4.57605	36	11.4582	36	24.5256		36	3.16311	36	3.00462	36	5.03984		36	0	36	24.5256	36	23.3824		36
						37	8.05693	37	9.60612	37	11.6613	37	8.18087	37	4.55704		37	1.93216	37	2.8806	37	2.79652	37	2.99162	37	1.88741		37	4.73728	37	11.6613	37	24.8856		37	3.00034	37	2.79652	37	4.66423		37	0	37	24.8856	37	23.6752		37
						38	8.18979	38	9.7913	38	11.85	38	8.37045	38	4.68138		38	1.79888	38	2.69466	38	2.60284	38	2.82522	38	1.81838		38	4.89013	38	11.85	38	25.2175		38	2.84594	38	2.60284	38	4.31661		38	0	38	25.2175	38	23.9445		38
						39	8.31346	39	9.96449	39	12.0252	39	8.54912	39	4.80064		39	1.67481	39	2.52072	39	2.42257	39	2.66702	39	1.75131		39	5.03504	39	12.0252	39	25.5236		39	2.69949	39	2.42257	39	3.9949		39	0	39	25.5236	39	24.1922		39
						40	8.42858	40	10.1264	40	12.188	40	8.71742	40	4.91498		40	1.55929	40	2.35801	40	2.25478	40	2.51673	40	1.6862		40	5.17241	40	12.188	40	25.8058		40	2.56057	40	2.25478	40	3.69717		40	0	40	25.8058	40	24.42		40
						41	8.53572	41	10.2779	41	12.3392	41	8.87587	41	5.02454		41	1.45173	41	2.2058	41	2.09862	41	2.37406	41	1.62302		41	5.30263	41	12.3392	41	26.0657		41	2.42881	41	2.09862	41	3.42163		41	0.8266	41	26.0657	41	24.6296		41
						42	8.63545	42	10.4195	42	12.4795	42	9.02498	42	5.12947		42	1.3516	42	2.06342	42	1.95327	42	2.23872	42	1.56177		42	5.42607	42	12.4795	42	26.3051		42	2.30382	42	1.95327	42	3.16662		42	1.62814	42	26.3051	42	24.8223		42
						43	8.72827	43	10.552	43	12.6098	43	9.16522	43	5.22992		43	1.25837	43	1.93023	43	1.81799	43	2.1104	43	1.50242		43	5.54308	43	12.6098	43	26.5256		43	2.18527	43	1.81799	43	2.93061		43	2.40532	43	26.5256	43	24.9995		43
						44	8.81465	44	10.6758	44	12.7308	44	9.29707	44	5.32603		44	1.17158	44	1.80563	44	1.69208	44	1.98882	44	1.44495		44	5.654	44	12.7308	44	26.7284		44	2.07281	44	1.69208	44	2.7122		44	3.15881	44	26.7284	44	25.1624		44
						45	8.89506	45	10.7916	45	12.843	45	9.42096	45	5.41793		45	1.09077	45	1.68908	45	1.57488	45	1.87369	45	1.38934		45	5.75912	45	12.843	45	26.915		45	1.96615	45	1.57488	45	2.51006		45	3.88927	45	26.915	45	25.3122		45
						46	8.96988	46	10.8999	46	12.947	46	9.53732	46	5.50578		46	1.01553	46	1.58005	46	1.46581	46	1.76472	46	1.33554		46	5.85875	46	12.947	46	27.0865		46	1.86497	46	1.46581	46	2.32299		46	4.59734	46	27.0865	46	25.45		46
						47	9.03952	47	11.0011	47	13.0436	47	9.64655	47	5.58969		47	0.945485	47	1.47806	47	1.36429	47	1.66164	47	1.28353		47	5.95318	47	13.0436	47	27.2441		47	1.769	47	1.36429	47	2.14986		47	5.28364	47	27.2441	47	25.5767		47
						48	9.10433	48	11.0958	48	13.1331	48	9.74905	48	5.66981		48	0.88027	48	1.38265	48	1.2698	48	1.56418	48	1.23327		48	6.04267	48	13.1331	48	27.3888		48	1.67796	48	1.2698	48	1.98964		48	5.94877	48	27.3888	48	25.6931		48
						49	9.16464	49	11.1843	49	13.2161	49	9.84518	49	5.74627		49	0.819553	49	1.2934	49	1.18185	49	1.47207	49	1.18473		49	6.12748	49	13.2161	49	27.5215		49	1.59162	49	1.18185	49	1.84135		49	6.59333	49	27.5215	49	25.8002		49
						50	9.22076	50	11.267	50	13.2929	50	9.93529	50	5.81918		50	0.763024	50	1.20991	50	1.1	50	1.38506	50	1.13786		50	6.20784	50	13.2929	50	27.6432		50	1.50971	50	1.1	50	1.70412		50	7.21788	50	27.6432	50	25.8985		50
						51	9.27298	51	11.3444	51	13.3641	51	10.0197	51	5.88869		51	0.710394	51	1.13181	51	1.02381	51	1.30289	51	1.09264		51	6.28399	51	13.3641	51	27.7547		51	1.43202	51	1.02381	51	1.57712		51	7.82299	51	27.7547	51	25.989		51
						52	9.32157	52	11.4167	52	13.4301	52	10.0988	52	5.95491		52	0.661395	52	1.05876	52	0.952905	52	1.22533	52	1.04901		52	6.35614	52	13.4301	52	27.8568		52	1.35833	52	0.952905	52	1.45958		52	8.40918	52	27.8568	52	26.0721		52
						53	9.36679	53	11.4843	53	13.4911	53	10.1728	53	6.01795		53	0.615775	53	0.990413	53	0.886907	53	1.15215	53	1.00694		53	6.4245	53	13.4911	53	27.95		53	1.28843	53	0.886907	53	1.3508		53	8.97699	53	27.95	53	26.1485		53
						54	9.40885	54	11.5474	54	13.5475	54	10.242	54	6.07794		54	0.573302	54	0.926483	54	0.825481	54	1.08312	54	0.966393		54	6.48927	54	13.5475	54	28.0352		54	1.22213	54	0.825481	54	1.25012		54	9.52693	54	28.0352	54	26.2186		54
						55	9.44799	55	11.6065	55	13.5997	55	10.3067	55	6.13498		55	0.533758	55	0.866679	55	0.768309	55	1.01804	55	0.927319		55	6.55062	55	13.5997	55	28.1129		55	1.15924	55	0.768309	55	1.15695		55	10.0595	55	28.1129	55	26.2831		55
						56	9.4844	56	11.6617	56	13.648	56	10.3672	56	6.18919		56	0.496942	56	0.810735	56	0.715096	56	0.956686	56	0.88968		56	6.60873	56	13.648	56	28.1837		56	1.09958	56	0.715096	56	1.07073		56	10.5752	56	28.1837	56	26.3423		56
						57	9.51827	57	11.7133	57	13.6925	57	10.4237	57	6.24066		57	0.462665	57	0.758403	57	0.665569	57	0.898873	57	0.853435		57	6.66378	57	13.6925	57	28.248		57	1.043	57	0.665569	57	0.990928		57	11.0744	57	28.248	57	26.3967		57
						58	9.54977	58	11.7615	58	13.7337	58	10.4764	58	6.28951		58	0.430753	58	0.709448	58	0.619472	58	0.844411	58	0.818543		58	6.71591	58	13.7337	58	28.3064		58	0.989326	58	0.619472	58	0.917076		58	11.5577	58	28.3064	58	26.4466		58
						59	9.57907	59	11.8065	59	13.7716	59	10.5255	59	6.33584		59	0.401042	59	0.663654	59	0.576568	59	0.79312	59	0.784963		59	6.76528	59	13.7716	59	28.3593		59	0.938416	59	0.576568	59	0.848727		59	12.0255	59	28.3593	59	26.4925		59
						60	9.60633	60	11.8486	60	13.8066	60	10.5714	60	6.37973		60	0.37338	60	0.620815	60	0.536635	60	0.744828	60	0.752654		60	6.81204	60	13.8066	60	28.4071		60	0.890125	60	0.536635	60	0.785473		60	12.4782	60	28.4071	60	26.5346		60
						61	9.63168	61	11.8879	61	13.8388	61	10.614	61	6.42128		61	0.347626	61	0.580742	61	0.499468	61	0.699371	61	0.721577		61	6.8563	61	13.8388	61	28.4502		61	0.844319	61	0.499468	61	0.726933		61	12.9162	61	28.4502	61	26.5732		61
						62	9.65525	62	11.9246	62	13.8684	62	10.6537	62	6.46059		62	0.323648	62	0.543255	62	0.464876	62	0.656593	62	0.691693		62	6.89822	62	13.8684	62	28.489		62	0.80087	62	0.464876	62	0.672756		62	13.34	62	28.489	62	26.6087		62
						63	9.67716	63	11.959	63	13.8957	63	10.6906	63	6.49773		63	0.301324	63	0.508188	63	0.432679	63	0.616346	63	0.662962		63	6.93789	63	13.8957	63	28.5237		63	0.759658	63	0.432679	63	0.622616		63	13.7499	63	28.5237	63	26.6412		63
						64	9.69754	64	11.991	64	13.9207	64	10.7249	64	6.5328		64	0.28054	64	0.475385	64	0.402712	64	0.578489	64	0.635347		64	6.97545	64	13.9207	64	28.5547		64	0.720566	64	0.402712	64	0.576214		64	14.1464	64	28.5547	64	26.671		64
						65	9.71648	65	12.0209	65	13.9436	65	10.7568	65	6.56588		65	0.26119	65	0.444699	65	0.37482	65	0.542887	65	0.60881		65	7.01099	65	13.9436	65	28.5822		65	0.683485	65	0.37482	65	0.53327		65	14.5297	65	28.5822	65	26.6984		65
						66	9.73409	66	12.0489	66	13.9646	66	10.7863	66	6.59705		66	0.243175	66	0.415994	66	0.34886	66	0.509413	66	0.583316		66	7.04463	66	13.9646	66	28.6066		66	0.648313	66	0.34886	66	0.493526		66	14.9003	66	28.6066	66	26.7235		66
						67	9.75045	67	12.075	67	13.9838	67	10.8136	67	6.62638		67	0.226401	67	0.389142	67	0.324699	67	0.477946	67	0.558827		67	7.07645	67	13.9838	67	28.628		67	0.614951	67	0.324699	67	0.456744		67	15.2586	67	28.628	67	26.7464		67
						68	9.76566	68	12.0994	68	14.0014	68	10.8389	68	6.65394		68	0.210785	68	0.364023	68	0.30221	68	0.448371	68	0.535309		68	7.10656	68	14.0014	68	28.6466		68	0.583306	68	0.30221	68	0.422704		68	15.6048	68	28.6466	68	26.7675		68
						69	9.7798	69	12.1221	69	14.0173	69	10.8623	69	6.67981		69	0.196246	69	0.340526	69	0.281279	69	0.42058	69	0.512728		69	7.13504	69	14.0173	69	28.6628		69	0.553289	69	0.281279	69	0.3912		69	15.9394	69	28.6628	69	26.7867		69
						70	9.79292	70	12.1433	70	14.0319	70	10.8838	70	6.70406		70	0.18271	70	0.318545	70	0.261798	70	0.394469	70	0.49105		70	7.16198	70	14.0319	70	28.6766		70	0.524817	70	0.261798	70	0.362045		70	16.2625	70	28.6766	70	26.8044		70
						71	9.80512	71	12.1631	71	14.0451	71	10.9037	71	6.72675		71	0.170108	71	0.297983	71	0.243666	71	0.369942	71	0.470244		71	7.18745	71	14.0451	71	28.6882		71	0.49781	71	0.243666	71	0.335062		71	16.5747	71	28.6882	71	26.8205		71
						72	9.81644	72	12.1816	72	14.057	72	10.9219	72	6.74795		72	0.158375	72	0.278748	72	0.22679	72	0.346905	72	0.450277		72	7.21154	72	14.057	72	28.6978		72	0.472192	72	0.22679	72	0.31009		72	16.8761	72	28.6978	72	26.8352		72
						73	9.82696	73	12.1989	73	14.0678	73	10.9387	73	6.76771		73	0.147451	73	0.260755	73	0.211083	73	0.325271	73	0.431119		73	7.2343	73	14.0678	73	28.7056		73	0.447893	73	0.211083	73	0.28698		73	17.167	73	28.7056	73	26.8487		73
						74	9.83672	74	12.2149	74	14.0774	74	10.9541	74	6.7861		74	0.13728	74	0.243924	74	0.196463	74	0.304959	74	0.41274		74	7.25581	74	14.0774	74	28.7117		74	0.424845	74	0.196463	74	0.265592		74	17.4478	74	28.7117	74	26.861		74
						75	9.84579	75	12.2299	75	14.0861	75	10.9681	75	6.80318		75	0.127811	75	0.228178	75	0.182856	75	0.285889	75	0.395111		75	7.27614	75	14.0861	75	28.7161		75	0.402982	75	0.182856	75	0.245798		75	17.7188	75	28.7161	75	26.8722		75
						76	9.85419	76	12.2439	76	14.0938	76	10.9809	76	6.81899		76	0.118995	76	0.21345	76	0.170192	76	0.267989	76	0.378204		76	7.29535	76	14.0938	76	28.7191		76	0.382245	76	0.170192	76	0.227479		76	17.9802	76	28.7191	76	26.8825		76
						77	9.862	77	12.2569	77	14.1007	77	10.9925	77	6.83359		77	0.110788	77	0.199672	77	0.158405	77	0.251189	77	0.361992		77	7.31349	77	14.1007	77	28.7208		77	0.362575	77	0.158405	77	0.210525		77	18.2323	77	28.7208	77	26.8918		77
						78	9.86923	78	12.2691	78	14.1067	78	11.0031	78	6.84704		78	0.103146	78	0.186783	78	0.147434	78	0.235424	78	0.346448		78	7.33061	78	14.1067	78	28.7212		78	0.343917	78	0.147434	78	0.194835		78	18.4753	78	28.7212	78	26.9003		78
						79	9.87594	79	12.2804	79	14.112	79	11.0126	79	6.85937		79	0.0960316	79	0.174726	79	0.137222	79	0.220631	79	0.331547		79	7.34678	79	14.112	79	28.7204		79	0.326219	79	0.137222	79	0.180314		79	18.7095	79	28.7204	79	26.908		79
						80	9.88215	80	12.2909	80	14.1166	80	11.0212	80	6.87064		80	0.0894078	80	0.163448	80	0.127718	80	0.206752	80	0.317264		80	7.36203	80	14.1166	80	28.7186		80	0.309431	80	0.127718	80	0.166876		80	18.9352	80	28.7186	80	26.915		80
						81	9.88791	81	12.3007	81	14.1205	81	11.0288	81	6.8809		81	0.0832409	81	0.152897	81	0.118873	81	0.193732	81	0.303575		81	7.37642	81	14.1205	81	28.7158		81	0.293508	81	0.118873	81	0.154439		81	19.1526	81	28.7158	81	26.9213		81
						82	9.89325	82	12.3098	82	14.1238	82	11.0356	82	6.89018		82	0.0774993	82	0.143028	82	0.11064	82	0.18152	82	0.290457		82	7.39	82	14.1238	82	28.712		82	0.278404	82	0.11064	82	0.142929		82	19.3619	82	28.712	82	26.927		82
						83	9.89819	83	12.3183	83	14.1266	83	11.0417	83	6.89853		83	0.0721538	83	0.133795	83	0.102977	83	0.170066	83	0.277888		83	7.40279	83	14.1266	83	28.7074		83	0.264078	83	0.102977	83	0.132276		83	19.5634	83	28.7074	83	26.9322		83
						84	9.90276	84	12.3262	84	14.1288	84	11.047	84	6.90598		84	0.067177	84	0.125159	84	0.0958448	84	0.159324	84	0.265846		84	7.41485	84	14.1288	84	28.702		84	0.250488	84	0.0958448	84	0.122418		84	19.7572	84	28.702	84	26.9369		84
						85	9.90698	85	12.3335	85	14.1305	85	11.0515	85	6.91258		85	0.0625434	85	0.11708	85	0.0892067	85	0.149252	85	0.25431		85	7.42621	85	14.1305	85	28.6959		85	0.237598	85	0.0892067	85	0.113294		85	19.9437	85	28.6959	85	26.9411		85
						86	9.91089	86	12.3403	86	14.1317	86	11.0555	86	6.91837		86	0.0582295	86	0.109523	86	0.0830283	86	0.139808	86	0.243259		86	7.43691	86	14.1317	86	28.6891		86	0.225371	86	0.0830283	86	0.104851		86	20.1229	86	28.6891	86	26.9449		86
						87	9.9145	87	12.3466	87	14.1326	87	11.0588	87	6.92337		87	0.0542131	87	0.102453	87	0.0772778	87	0.130954	87	0.232676		87	7.44697	87	14.1326	87	28.6817		87	0.213774	87	0.0772778	87	0.0970364		87	20.2952	87	28.6817	87	26.9483		87
						88	9.91783	88	12.3525	88	14.133	88	11.0616	88	6.92763		88	0.0504737	88	0.0958397	88	0.0719256	88	0.122653	88	0.22254		88	7.45645	88	14.133	88	28.6737		88	0.202773	88	0.0719256	88	0.0898045		88	20.4606	88	28.6737	88	26.9513		88
						89	9.92091	89	12.3579	89	14.1331	89	11.0638	89	6.93117		89	0.0469923	89	0.0896533	89	0.0669441	89	0.114873	89	0.212835		89	7.46535	89	14.1331	89	28.6652		89	0.192338	89	0.0669441	89	0.0831115		89	20.6195	89	28.6652	89	26.954		89
						90	9.92374	90	12.363	90	14.1328	90	11.0655	90	6.93402		90	0.043751	90	0.0838662	90	0.0623076	90	0.107581	90	0.203542		90	7.47372	90	14.1328	90	28.6562		90	0.18244	90	0.0623076	90	0.0769173		90	20.7719	90	28.6562	90	26.9564		90
						91	9.92635	91	12.3676	91	14.1322	91	11.0667	91	6.93622		91	0.0407332	91	0.0784527	91	0.0579922	91	0.100746	91	0.194644		91	7.48158	91	14.1322	91	28.6467		91	0.173052	91	0.0579922	91	0.0711848		91	20.9181	91	28.6467	91	26.9585		91
						92	9.92875	92	12.3719	92	14.1313	92	11.0675	92	6.9378		92	0.0379237	92	0.0733886	92	0.0539757	92	0.0943409	92	0.186127		92	7.48896	92	14.1313	92	28.6369		92	0.164147	92	0.0539757	92	0.0658795		92	21.0583	92	28.6369	92	26.9603		92
						93	9.93096	93	12.3759	93	14.1302	93	11.0679	93	6.93878		93	0.0353079	93	0.0686514	93	0.0502374	93	0.0883388	93	0.177973		93	7.49588	93	14.1302	93	28.6266		93	0.1557	93	0.0502374	93	0.0609696		93	21.1925	93	28.6266	93	26.9619		93
						94	9.93299	94	12.3796	94	14.1287	94	11.0679	94	6.93919		94	0.0328725	94	0.06422	94	0.046758	94	0.0827148	94	0.170169		94	7.50236	94	14.1287	94	28.616		94	0.147688	94	0.046758	94	0.0564256		94	21.3211	94	28.616	94	26.9633		94
						95	9.93485	95	12.383	95	14.1271	95	11.0675	95	6.93905		95	0.0306051	95	0.0600747	95	0.0435196	95	0.0774454	95	0.1627		95	7.50843	95	14.1271	95	28.605		95	0.140088	95	0.0435196	95	0.0522203		95	21.444	95	28.605	95	26.9644		95
						96	9.93655	96	12.3861	96	14.1252	96	11.0668	96	6.93839		96	0.0284941	96	0.0561969	96	0.0405054	96	0.0725086	96	0.155551		96	7.51411	96	14.1252	96	28.5938		96	0.132879	96	0.0405054	96	0.0483284		96	21.5616	96	28.5938	96	26.9654		96
						97	9.93811	97	12.389	97	14.1231	97	11.0658	97	6.93723		97	0.0265287	97	0.0525694	97	0.0377001	97	0.0678836	97	0.14871		97	7.51943	97	14.1231	97	28.5822		97	0.126041	97	0.0377001	97	0.0447266		97	21.674	97	28.5822	97	26.9662		97
						98	9.93954	98	12.3917	98	14.1208	98	11.0645	98	6.9356		98	0.0246989	98	0.0491761	98	0.035089	98	0.0635512	98	0.142164		98	7.52439	98	14.1208	98	28.5704		98	0.119555	98	0.035089	98	0.0413932		98	21.7812	98	28.5704	98	26.9669		98
						99	9.94083	99	12.3941	99	14.1183	99	11.0629	99	6.93351		99	0.0229953	99	0.0460018	99	0.0326587	99	0.0594929	99	0.135901		99	7.52901	99	14.1183	99	28.5584		99	0.113402	99	0.0326587	99	0.0383082		99	21.8836	99	28.5584	99	26.9674		99
						100	9.94201	100	12.3963	100	14.1157	100	11.061	100	6.93099		100	0.0214092	100	0.0430324	100	0.0303968	100	0.0556917	100	0.129909		100	7.53332	100	14.1157	100	28.5461		100	0.107567	100	0.0303968	100	0.0354532		100	21.9811	100	28.5461	100	26.9677		100
						101	9.94308	101	12.3983	101	14.1129	101	11.0589	101	6.92806		101	0.0199325	101	0.0402547	101	0.0282916	101	0.0521314	101	0.124176		101	7.53733	101	14.1129	101	28.5337		101	0.102031	101	0.0282916	101	0.0328109		101	22.0739	101	28.5337	101	26.968		101
						102	9.94405	102	12.4002	102	14.11	102	11.0565	102	6.92473		102	0.0185576	102	0.0376562	102	0.0263321	102	0.0487971	102	0.118692		102	7.54106	102	14.11	102	28.521		102	0.0967808	102	0.0263321	102	0.0303656		102	22.1622	102	28.521	102	26.9681		102
						103	9.94492	103	12.4019	103	14.1069	103	11.054	103	6.92102		103	0.0172776	103	0.0352256	103	0.0245084	103	0.0456744	103	0.113446		103	7.54451	103	14.1069	103	28.5082		103	0.0918005	103	0.0245084	103	0.0281025		103	22.2461	103	28.5082	103	26.9681		103
						104	9.94571	104	12.4034	104	14.1037	104	11.0512	104	6.91696		104	0.0160859	104	0.0329518	104	0.0228109	104	0.0427502	104	0.108427		104	7.54771	104	14.1037	104	28.4952		104	0.0870764	104	0.0228109	104	0.026008		104	22.3257	104	28.4952	104	26.9681		104
						105	9.94641	105	12.4048	105	14.1004	105	11.0483	105	6.91255		105	0.0149764	105	0.0308247	105	0.0212311	105	0.0400119	105	0.103628		105	7.55067	105	14.1004	105	28.482		105	0.0825955	105	0.0212311	105	0.0240697		105	22.4012	105	28.482	105	26.9679		105
						106	9.94704	106	12.406	106	14.097	106	11.0452	106	6.90781		106	0.0139434	106	0.028835	106	0.0197606	106	0.0374479	106	0.0990375		106	7.55339	106	14.097	106	28.4688		106	0.0783451	106	0.0197606	106	0.0222758		106	22.4726	106	28.4688	106	26.9677		106
						107	9.94759	107	12.4071	107	14.0935	107	11.0419	107	6.90276		107	0.0129816	107	0.0269737	107	0.018392	107	0.0350471	107	0.0946474		107	7.5559	107	14.0935	107	28.4554		107	0.0743135	107	0.018392	107	0.0206156		107	22.5401	107	28.4554	107	26.9674		107
						108	9.94808	108	12.4081	108	14.0899	108	11.0385	108	6.89741		108	0.0120862	108	0.0252326	108	0.0171182	108	0.0327993	108	0.0904491		108	7.5582	108	14.0899	108	28.4419		108	0.0704893	108	0.0171182	108	0.0190792		108	22.6039	108	28.4419	108	26.967		108
						109	9.94851	109	12.409	109	14.0862	109	11.0349	109	6.89178		109	0.0112526	109	0.0236039	109	0.0159326	109	0.0306948	109	0.0864345		109	7.56031	109	14.0862	109	28.4282		109	0.066862	109	0.0159326	109	0.0176572		109	22.6639	109	28.4282	109	26.9665		109
						110	9.94888	110	12.4097	110	14.0824	110	11.0312	110	6.88588		110	0.0104764	110	0.0220802	110	0.0148291	110	0.0287245	110	0.0825956		110	7.56222	110	14.0824	110	28.4145		110	0.0634212	110	0.0148291	110	0.0163413		110	22.7203	110	28.4145	110	26.966		110
						111	9.94919	111	12.4104	111	14.0786	111	11.0274	111	6.87972		111	0.0097538	111	0.020655	111	0.0138021	111	0.02688	111	0.0789249		111	7.56397	111	14.0786	111	28.4007		111	0.0601576	111	0.0138021	111	0.0151234		111	22.7732	111	28.4007	111	26.9655		111
						112	9.94946	112	12.411	112	14.0746	112	11.0234	112	6.87332		112	0.00908103	112	0.0193217	112	0.0128461	112	0.0251534	112	0.0754153		112	7.56554	112	14.0746	112	28.3868		112	0.0570619	112	0.0128461	112	0.0139963		112	22.8228	112	28.3868	112	26.9649		112
						113	9.94968	113	12.4115	113	14.0707	113	11.0194	113	6.86668		113	0.00845466	113	0.0180745	113	0.0119564	113	0.023537	113	0.0720599		113	7.56695	113	14.0707	113	28.3728		113	0.0541255	113	0.0119564	113	0.0129531		113	22.8691	113	28.3728	113	26.9642		113
						114	9.94985	114	12.4119	114	14.0666	114	11.0152	114	6.85982		114	0.0078715	114	0.0169078	114	0.0111283	114	0.022024	114	0.0688519		114	7.56822	114	14.0666	114	28.3588		114	0.0513402	114	0.0111283	114	0.0119878		114	22.9122	114	28.3588	114	26.9635		114
						115	9.94999	115	12.4123	115	14.0625	115	11.011	115	6.85275		115	0.00732856	115	0.0158164	115	0.0103576	115	0.0206078	115	0.065785		115	7.56934	115	14.0625	115	28.3447		115	0.0486982	115	0.0103576	115	0.0110943		115	22.9522	115	28.3447	115	26.9628		115
						116	9.95009	116	12.4125	116	14.0584	116	11.0066	116	6.84547		116	0.00682307	116	0.0147955	116	0.00964024	116	0.0192822	116	0.0628533		116	7.57032	116	14.0584	116	28.3305		116	0.0461922	116	0.00964024	116	0.0102675		116	22.9892	116	28.3305	116	26.962		116
						117	9.95015	117	12.4127	117	14.0542	117	11.0022	117	6.83801		117	0.00635245	117	0.0138404	117	0.00897256	117	0.0180415	117	0.0600507		117	7.57118	117	14.0542	117	28.3163		117	0.0438152	117	0.00897256	117	0.00950227		117	23.0232	117	28.3163	117	26.9613		117
						118	9.95019	118	12.4129	118	14.0499	118	10.9977	118	6.83036		118	0.00591429	118	0.012947	118	0.00835113	118	0.0168803	118	0.0573718		118	7.57191	118	14.0499	118	28.302		118	0.0415604	118	0.00835113	118	0.00879408		118	23.0545	118	28.302	118	26.9604		118
						119	9.95019	119	12.413	119	14.0456	119	10.9931	119	6.82253		119	0.00550635	119	0.0121113	119	0.00777274	119	0.0157935	119	0.0548111		119	7.57253	119	14.0456	119	28.2877		119	0.0394217	119	0.00777274	119	0.00813868		119	23.083	119	28.2877	119	26.9596		119
						120	9.95016	120	12.413	120	14.0413	120	10.9885	120	6.81455		120	0.00512655	120	0.0113295	120	0.0072344	120	0.0147764	120	0.0523636		120	7.57304	120	14.0413	120	28.2734		120	0.0373931	120	0.0072344	120	0.00753211		120	23.1088	120	28.2734	120	26.9587		120
						121	9.95011	121	12.413	121	14.037	121	10.9837	121	6.8064		121	0.00477294	121	0.0105982	121	0.00673335	121	0.0138245	121	0.0500242		121	7.57345	121	14.037	121	28.259		121	0.0354689	121	0.00673335	121	0.00697076		121	23.1321	121	28.259	121	26.9578		121
						122	9.95003	122	12.4129	122	14.0326	122	10.979	122	6.79811		122	0.00444373	122	0.00991411	122	0.00626701	122	0.0129337	122	0.0477884		122	7.57375	122	14.0326	122	28.2446		122	0.0336436	122	0.00626701	122	0.00645124		122	23.1528	122	28.2446	122	26.9569		122
						123	9.94993	123	12.4128	123	14.0281	123	10.9742	123	6.78967		123	0.00413722	123	0.00927416	123	0.00583296	123	0.0121001	123	0.0456516		123	7.57396	123	14.0281	123	28.2301		123	0.0319123	123	0.00583296	123	0.00597044		123	23.1711	123	28.2301	123	26.9559		123
						124	9.94981	124	12.4127	124	14.0237	124	10.9693	124	6.7811		124	0.00385185	124	0.00867552	124	0.00542897	124	0.01132	124	0.0436095		124	7.57409	124	14.0237	124	28.2156		124	0.0302701	124	0.00542897	124	0.00552547		124	23.187	124	28.2156	124	26.955		124
						125	9.94967	125	12.4125	125	14.0192	125	10.9644	125	6.7724		125	0.00358617	125	0.00811552	125	0.00505296	125	0.01059	125	0.041658		125	7.57413	125	14.0192	125	28.2011		125	0.0287124	125	0.00505296	125	0.00511366		125	23.2006	125	28.2011	125	26.954		125
						126	9.94951	126	12.4122	126	14.0147	126	10.9594	126	6.76359		126	0.00333881	126	0.00759166	126	0.004703	126	0.00990699	126	0.039793		126	7.57409	126	14.0147	126	28.1866		126	0.0272349	126	0.004703	126	0.00473255		126	23.212	126	28.1866	126	26.953		126
						127	9.94933	127	12.412	127	14.0102	127	10.9544	127	6.75465		127	0.00310852	127	0.00710163	127	0.00437727	127	0.00926785	127	0.0380108		127	7.57397	127	14.0102	127	28.172		127	0.0258334	127	0.00437727	127	0.00437984		127	23.2213	127	28.172	127	26.952		127
						128	9.94914	128	12.4117	128	14.0056	128	10.9493	128	6.74561		128	0.00289411	128	0.00664322	128	0.00407411	128	0.00866981	128	0.0363079		128	7.57378	128	14.0056	128	28.1575		128	0.024504	128	0.00407411	128	0.00405342		128	23.2284	128	28.1575	128	26.951		128
						129	9.94893	129	12.4114	129	14.0011	129	10.9442	129	6.73646		129	0.00269449	129	0.0062144	129	0.00379194	129	0.00811024	129	0.0346806		129	7.57353	129	14.0011	129	28.1429		129	0.023243	129	0.00379194	129	0.00375132		129	23.2335	129	28.1429	129	26.9499		129
						130	9.94871	130	12.411	130	13.9965	130	10.9391	130	6.72722		130	0.00250863	130	0.00581327	130	0.00352931	130	0.00758668	130	0.0331257		130	7.57321	130	13.9965	130	28.1283		130	0.0220469	130	0.00352931	130	0.00347174		130	23.2367	130	28.1283	130	26.9489		130
						131	9.94848	131	12.4106	131	13.9919	131	10.934	131	6.71788		131	0.0023356	131	0.00543802	131	0.00328487	131	0.00709682	131	0.03164		131	7.57282	131	13.9919	131	28.1137		131	0.0209124	131	0.00328487	131	0.003213		131	23.2379	131	28.1137	131	26.9478		131
						132	9.94824	132	12.4102	132	13.9873	132	10.9288	132	6.70846		132	0.0021745	132	0.005087	132	0.00305736	132	0.0066385	132	0.0302204		132	7.57238	132	13.9873	132	28.099		132	0.0198363	132	0.00305736	132	0.00297354		132	23.2373	132	28.099	132	26.9468		132
						133	9.94798	133	12.4098	133	13.9827	133	10.9236	133	6.69895		133	0.00202451	133	0.00475864	133	0.00284561	133	0.0062097	133	0.0288642		133	7.57189	133	13.9827	133	28.0844		133	0.0188155	133	0.00284561	133	0.00275193		133	23.2349	133	28.0844	-	-		133
						134	9.94771	134	12.4094	134	13.978	134	10.9184	134	6.68937		134	0.00188487	134	0.00445147	134	0.00264853	134	0.00580852	134	0.0275683		134	7.57134	134	13.978	-	-		134	0.0178472	134	0.00264853	-	-		134	23.2307	134	26.7016	-	-		134
						-	-	135	12.4089	-	-	135	10.9131	-	-		-	-	135	0.00416413	-	-	135	0.0054332	-	-		135	7.57074	-	-	-	-		135	0.0169288	-	-	-	-		135	23.2248	135	26.7019	-	-		135
																												136	7.5701	-	-	-	-		136	0.0160577	-	-	-	-		136	23.2173	-	-	-	-		136
						0:10		3:7		6:4		7:3		8:2														137	7.56941	-	-	-	-		137	0.0152313	-	-	-	-		137	23.2082	-	-	-	-		137
						t (min)	mb, exp	t (min)	mb, exp	t (min)	mb, exp	t (min)	mb, exp	t (min)	mb, exp													138	7.56868	-	-	-	-		138	0.0144475	-	-	-	-		138	23.1976	-	-	-	-		138
						14	0	15	0	14	0	15	0	14	0													139	7.56791	-	-	-	-		139	0.0137041	-	-	-	-		139	23.1855	-	-	-	-		139
						16	2.39372	17	2.21198	16	4.17347	17	1.6665	16	0.531071																											140	23.1719	-	-	-	-		140
						19	4.1648	20	5.64642	19	6.51779	20	3.3313	19	0.973484													13g		26g		52g										141	23.157	-	-	-	-		141
						21	5.25925	22	5.26258	21	6.77057	22	3.99215	21	1.76383													t (min)	mb, exp	t (min)	mb, exp	t (min)	mb, exp									142	23.1406	-	-	-	-		142
						24	5.31256	25	6.67544	24	7.71461	25	4.96437	24	2.24902													19	0	14	0	13	0									143	23.123	-	-	-	-		143
						26	5.89851	27	6.77916	26	8.42948	27	4.96275	26	2.37863													21	0.555491	16	4.17347	15	3.66414									144	23.1041	-	-	-	-		144
						29	6.52042	30	7.44829	29	9.07406	30	6.39192	29	3.83372													24	1.46555	19	6.51779	18	9.77151									145	23.0839	-	-	-	-		145
						34	6.64312	35	9.84646	34	10.0829	35	7.52824	34	3.79081													26	2.06362	21	6.77057	20	12.8876									146	23.0625	-	-	-	-		146
						44	8.01419	45	9.90436	44	12.2432	45	8.86073	44	5.98241													29	3.50539	24	7.71461	23	16.8551									147	23.04	-	-	-	-		147
						54	9.26087	55	10.9818	54	13.1822	55	11.2594	54	6.07047													31	3.89124	26	8.42948	25	18.9629									148	23.0164	-	-	-	-		148
						74	9.80451	75	11.6886	74	13.9322	75	10.3487	74	6.5987													34	4.97251	29	9.07406	28	21.6549									149	22.9917	-	-	-	-		149
						89	9.95184	90	12.1289	89	14.0504	90	11.1641	89	6.82256													39	5.57629	34	10.0829	33	23.9696									150	22.9659	-	-	-	-		150
						104	10.4241	105	12.7436	104	14.1488	105	11.548	104	6.94717													49	5.64159	44	12.2432	43	25.9044									151	22.9391	-	-	-	-		151
						134	9.87	135	12.8521	134	14.3822	135	10.65	134	6.73646													59	6.0363	54	13.1822	53	26.0254									152	22.9114	-	-	-	-		152
																												79	7.09354	74	13.9322	73	27.0018									153	22.8826	-	-	-	-		153
																												94	7.80738	89	14.0504	88	28.6944									154	22.853	-	-	-	-		154
																												109	7.6663	104	14.1488	103	28.5192									155	22.8225	-	-	-	-		155
																												139	7.61123	134	14.3822	133	29.3784									156	22.7911	-	-	-	-		156
																																										157	22.7588	-	-	-	-		157
																																										158	22.7258	-	-	-	-		158
																																										159	22.692	-	-	-	-		159
																																										160	22.6574	-	-	-	-		160
																																										3.24 mL/min		8.64 mL/min		10.80 mL/min
																																										t (min)	mb, exp	t (min)	mb, exp	t (min)	mb, exp
																																										40	0	15	0	12	0
																																										42	3.45133	17	3.66414	14	5.62413
																																										45	5.88377	20	9.77151	17	8.01563
																																										47	6.92218	22	12.8876	19	9.51093
																																										50	8.32418	25	16.8551	22	11.5861
																																										52	9.07102	27	18.9629	24	15.5567
																																										55	10.4487	30	21.6549	27	16.9088
																																										60	12.1432	35	23.9696	32	21.1328
																																										70	15.8208	45	25.9044	42	25.1844
																																										80	18.9278	55	26.0254	52	26.8922
																																										100	20.952	75	27.0018	72	26.9713
																																										115	21.8487	90	28.6944	87	27.7056
																																										130	22.4654	105	28.5192	102	27.0814
																																										160	24.4462	135	29.3784	132	27.0693
[truncated: 5 more columns]
